# Supplementary material for: Biologics may have a beneficial effect in asthma patients with COVID-19
Source: PubMed Central journal article supplement — Eur Respir J. 2021 Aug 26;58(2):2101076. doi: 10.1183/13993003.01076-2021 (PMC8287737; doi:10.1183/13993003.01076-2021), 2021-08-26

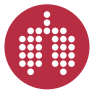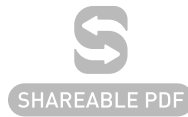

# Biologics may have a beneficial effect in asthma patients with COVID-19

José L. Izquierdo<sup>1,2</sup> and Joan B. Soriano <sup>3,4,5</sup>

<sup>1</sup>Universidad de Alcalá, Madrid, Spain. <sup>2</sup>Hospital Universitario de Guadalajara, Guadalajara, Spain. <sup>3</sup>Hospital Universitario de La Princesa, Madrid, Spain. <sup>4</sup>Universidad Autónoma de Madrid, Madrid, Spain. <sup>5</sup>Centro de Investigación en Red de Enfermedades Respiratorias (CIBERES), Instituto de Salud Carlos III (ISCIII), Madrid, Spain.

Joan B. Soriano ([jbsoriano2@gmail.com](mailto:jbsoriano2@gmail.com))

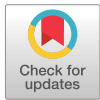

Shareable abstract ([@ERSpublications](#))

**Biologics may have a beneficial effect in asthma patients with COVID-19** <https://bit.ly/3hkor8X>

**Cite this article as:** Izquierdo JL, Soriano JB. Biologics may have a beneficial effect in asthma patients with COVID-19. *Eur Respir J* 2021; 58: 2101076 [DOI: 10.1183/13993003.01076-2021].

This single-page version can be shared freely online.

Copyright ©The authors 2021

This version is distributed under the terms of the Creative Commons Attribution Non-Commercial Licence 4.0. For commercial reproduction rights and permissions contact [permissions@ersnet.org](mailto:permissions@ersnet.org)

Received: 13 April 2021  
Accepted: 24 June 2021

*Reply to P.A.B. Wark and co-workers:*

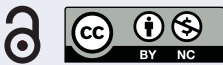

Supplement: ERJ-01076-2021.Shareable.pdf [file ERJ-01076-2021.Shareable.pdf]
